# Supplementary material
Source: publisher figshare collection journal article supplement (https://sage.figshare.com/ndownloader/files/12580655)
Supplement: Supplementary file 1 [file 12580655]

**Supplementary material to "Which attribute of ceiling color influences perceived room height?", Christoph von Castell, Heiko Hecht, and Daniel Oberfeld, *Human Factors*.**

*Supplementary Table 1A: Means (M) and standard deviations (SD) for the data from panel A of Figure 3.*

| Luminance | Ceiling height (cm) | <i>M</i> (cm) | <i>SD</i> (cm) |
|-----------|---------------------|---------------|----------------|
| Low       | 290                 | 259.63        | 49.19          |
|           | 300                 | 268.28        | 50.39          |
|           | 310                 | 277.55        | 51.14          |
| High      | 290                 | 260.75        | 49.21          |
|           | 300                 | 269.45        | 49.31          |
|           | 310                 | 279.35        | 50.62          |

*Supplementary Table 1B: Means (M) and standard deviations (SD) for the data from panel B of Figure 3.*

| Hue   | <i>M</i> (cm) | <i>SD</i> (cm) |
|-------|---------------|----------------|
| Red   | 269.57        | 49.87          |
| Green | 268.34        | 49.70          |
| Blue  | 269.57        | 49.90          |
| Gray  | 269.43        | 50.15          |

*Supplementary Table 1C: Means (M) and standard deviations (SD) for the data from panel C of Figure 3.*

| Saturation | Ceiling height (cm) | <i>M</i> (cm) | <i>SD</i> (cm) |
|------------|---------------------|---------------|----------------|
| Low        | 290                 | 260.29        | 48.87          |
|            | 300                 | 268.66        | 49.67          |
|            | 310                 | 278.66        | 50.98          |
| High       | 290                 | 260.08        | 49.49          |
|            | 300                 | 269.07        | 50.01          |
|            | 310                 | 278.23        | 50.78          |

*Supplementary Table 2: Means (M) and standard deviations (SD) for the data from*

*Figure 4.*

| Luminance | Ceiling height (cm) | Hue   | <i>M</i> (cm) | <i>SD</i> (cm) |
|-----------|---------------------|-------|---------------|----------------|
| Low       | 290                 | Red   | 260.35        | 49.18          |
|           |                     | Green | 259.27        | 49.57          |
|           |                     | Blue  | 259.25        | 48.98          |
|           | 300                 | Red   | 286.54        | 50.02          |
|           |                     | Green | 267.90        | 50.35          |
|           |                     | Blue  | 268.42        | 50.91          |
|           | 310                 | Red   | 277.56        | 51.49          |
|           |                     | Green | 276.22        | 51.08          |
|           |                     | Blue  | 278.79        | 50.99          |
| High      | 290                 | Red   | 261.71        | 49.58          |
|           |                     | Green | 259.85        | 49.20          |
|           |                     | Blue  | 260.69        | 49.02          |
|           | 300                 | Red   | 269.81        | 49.30          |
|           |                     | Green | 267.51        | 49.02          |
|           |                     | Blue  | 270.98        | 49.76          |
|           | 310                 | Red   | 279.38        | 50.91          |
|           |                     | Green | 279.28        | 50.17          |
|           |                     | Blue  | 279.36        | 50.98          |

*Supplementary Table 3: Means (M) and standard deviations (SD) for the data from*

*Figure 5.*

| Luminance | Ceiling height (cm) | <i>M</i> (cm) | <i>SD</i> (cm) |
|-----------|---------------------|---------------|----------------|
| Low       | 290                 | 259.57        | 49.36          |
|           | 300                 | 268.19        | 51.12          |
|           | 310                 | 278.77        | 52.12          |
| High      | 290                 | 260.85        | 49.67          |
|           | 300                 | 269.49        | 50.10          |
|           | 310                 | 279.79        | 50.65          |

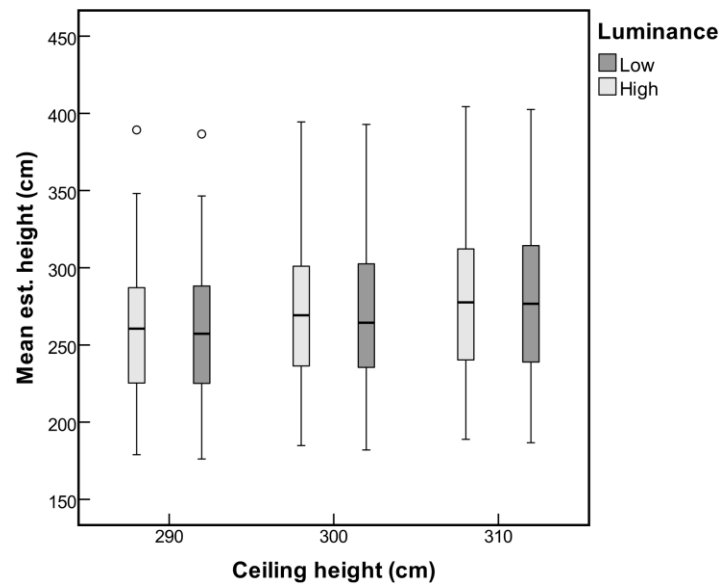

*Supplementary Figure 1A: Boxplots for the data from panel A of Figure 3. The box represents the inter-quartile range (IQR) between the 1<sup>st</sup> and 3<sup>rd</sup> quartile, the whiskers include the data points maximally 1.5 times the IQR smaller than the 1<sup>st</sup> quartile or higher than the 3<sup>rd</sup> quartile. Moderate outliers (more than 1.5 times the IQR lower than the 1<sup>st</sup> or higher than the 3<sup>rd</sup> quartile) are marked by a circle.*

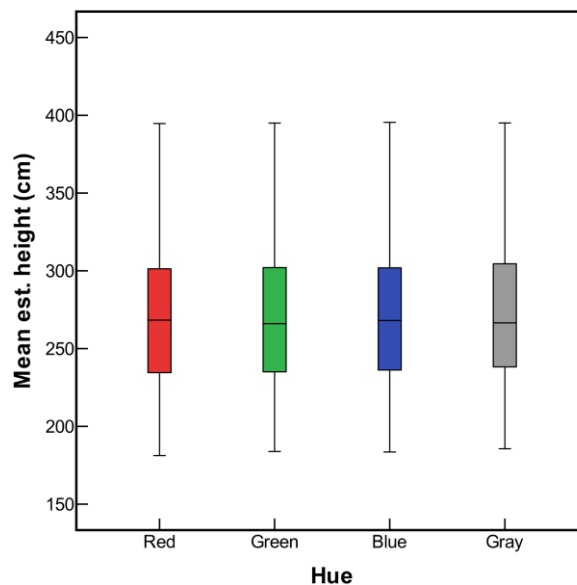

*Supplementary Figure 1B: Boxplots for the data from panel B of Figure 3. Same format as Supplementary Figure 1A.*

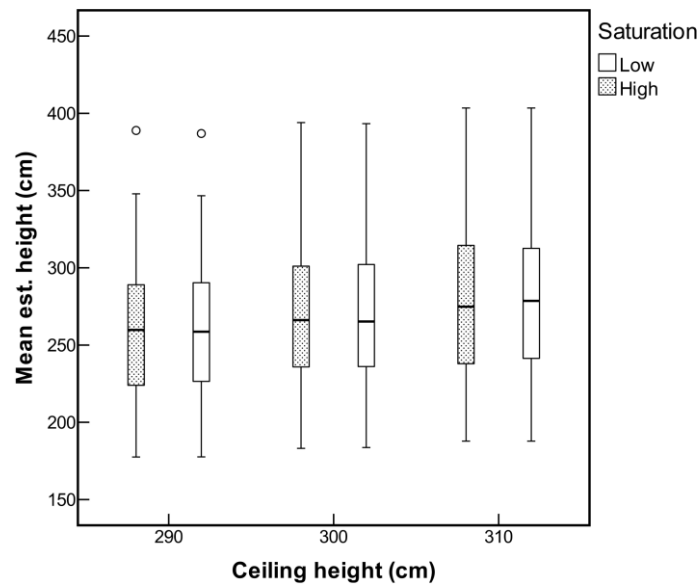

*Supplementary Figure 1C: Boxplots for the data from panel C of Figure 3. Same format as Supplementary Figure 1A.*

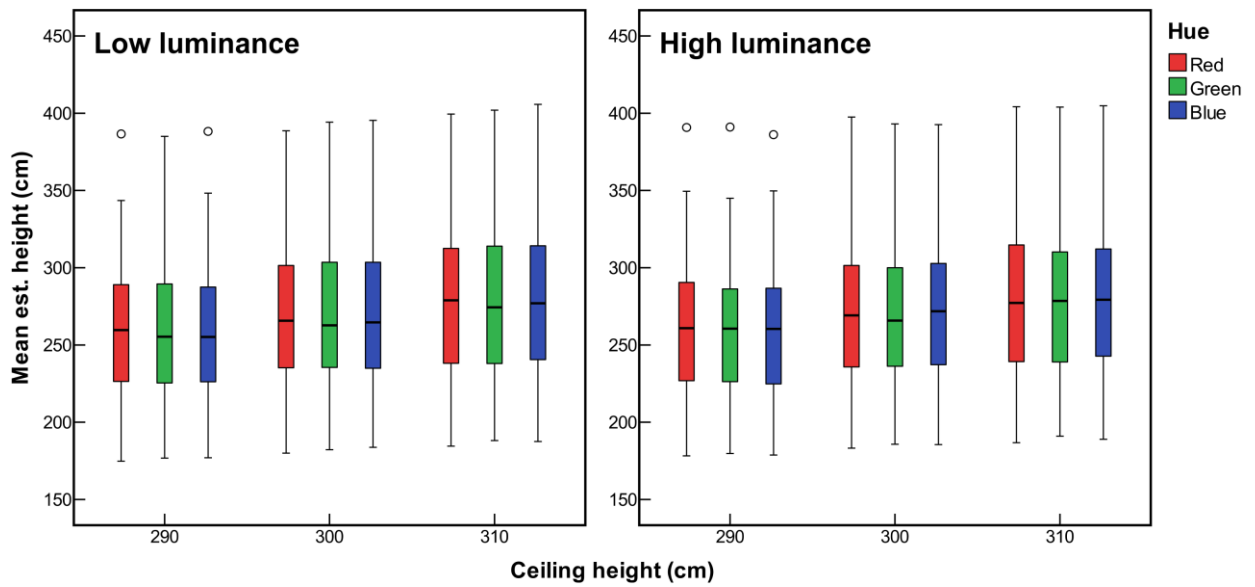

*Supplementary Figure 2: Boxplots for the data from Figure 4. Same format as Supplementary Figure 1A.*

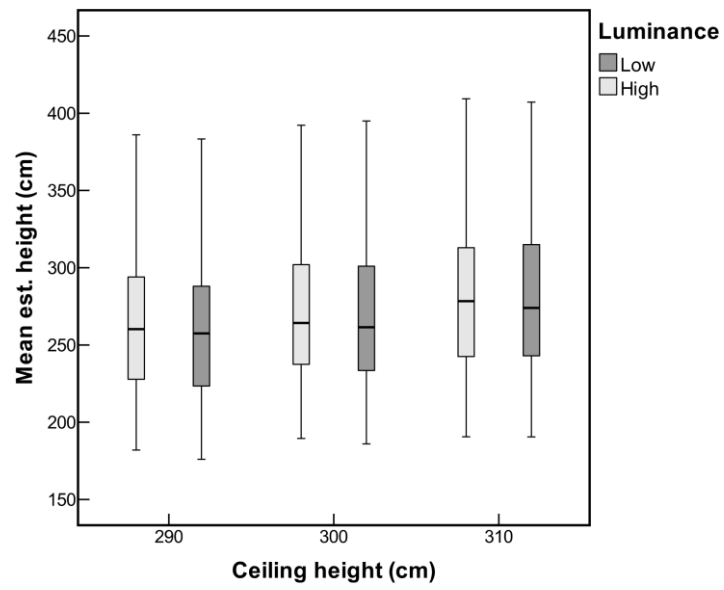

*Supplementary Figure 3: Boxplots for the data from Figure 5. Same format as Supplementary Figure 1A.*
